# Supplementary material
Source: Elsevier journal article supplement (https://www.sciencedirect.com/science/article/pii/S1665268122000709)
Supplement: mmc1 [file S1665268122000709:mmc1.docx]

Table Suppl. Influence of genetic ancestry on variables of interest related to non-alcoholic fatty liver disease outcomes in patients from an admixed population

|  | ***Gender*** | | |  | ***Type 2 diabetes*** | | |  | ***High blood pressure*** | | |  | ***HOMA-IR*** | | |  | ***Metabolic syndrome*** | | |  |
| --- | --- | --- | --- | --- | --- | --- | --- | --- | --- | --- | --- | --- | --- | --- | --- | --- | --- | --- | --- | --- |
| ***Ancestry (mean ± sd)*** | ***Male*** | ***Female*** | ***p-value*** |  | ***No*** | ***Yes*** | ***p-value*** |  | ***No*** | ***Yes*** | ***p-value*** |  | ***<2.5*** | ***≥2.5*** | ***p-value*** |  | ***No*** | ***Yes*** | ***p-value*** |  |
| ***African*** | 0.177 ± 0.177 | 0.169 ± 0.155 | 0.967 |  | 0.157 ± 0.163 | 0.181 ± 0.161 | 0.209 |  | 0.154 ± 0.146 | 0.181 ± 0.169 | 0.252 |  | 0.194 ± 0.205 | 0.170 ± 0.155 | 0.957 |  | 0.170 ± 0.144 | 0.173 ± 0.166 | 0.748 |  |
| ***European*** | 0.623 ± 0.233 | 0.649 ± 0.209 | 0.514 |  | 0.674 ± 0.201 | 0.619 ± 0.225 | 0.071 |  | 0.672 ± 0.198 | 0.629 ± 0.222 | 0.196 |  | 0.615 ± 0.255 | 0.641 ± 0.215 | 0.845 |  | 0.632 ± 0.198 | 0.642 ± 0.222 | 0.464 |  |
| ***East Asian*** | 0.104 ± 0.190 | 0.085 ± 0.150 | 0.886 |  | 0.075 ± 0.105 | 0.100 ± 0.190 | 0.627 |  | 0.082 ± 0.117 | 0.090 ± 0.172 | 0.603 |  | 0.097 ± 0.155 | 0.092 ± 0.172 | 0.441 |  | 0.094 ± 0.139 | 0.090 ± 0.171 | 0.095 |  |
| ***Amerindian*** | 0.097 ± 0.075 | 0.096 ± 0.088 | 0.403 |  | 0.093 ± 0.071 | 0.099 ± 0.094 | 0.855 |  | 0.093 ± 0.077 | 0.100 ± 0.091 | 0.661 |  | 0.095 ± 0.091 | 0.097 ± 0.084 | 0.614 |  | 0.104 ± 0.079 | 0.095 ± 0.088 | 0.254 |  |
|  |  |  |  |  |  |  |  |  |  |  |  |  |  |  |  |  |  |  |  |  |
|  |  |  |  |  |  |  |  |  |  |  |  |  |  |  |  |  |  |  |  |  |
|  | ***AST*** |  |  |  | ***ALT*** |  |  |  | ***AST/ALT ratio*** |  |  |  | ***GGT*** |  |  |  | ***Total cholesterol (mg/dL)*** | |  |  |
| ***Ancestry (mean ± sd)*** | ***Normal*** | ***Alterado*** | ***p-value*** |  | ***Normal*** | ***Alterado*** | ***p-value*** |  | ***Normal*** | ***Alterado*** | ***p-value*** |  | ***Normal*** | ***Alterado*** | ***p-value*** |  | ***Normal*** | ***Alterado*** | ***p-value*** |  |
| ***African*** | 0.174 ± 0.158 | 0.170 ± 0.168 | 0.369 |  | 0.175 ± 0.159 | 0.170 ± 0.164 | 0.472 |  | 0.172 ± 0.169 | 0.175 ± 0.136 | 0.386 |  | 0.157 ± 0.144 | 0.189 ± 0.178 | 0.383 |  | 0.176 ± 0.165 | 0.168 ± 0.159 | 0.720 |  |
| ***European*** | 0.636 ± 0.214 | 0.651 ± 0.224 | 0.450 |  | 0.627 ± 0.221 | 0.656 ± 0.214 | 0.310 |  | 0.645 ± 0.220 | 0.629 ± 0.210 | 0.472 |  | 0.651 ± 0.221 | 0.631 ± 0.214 | 0.367 |  | 0.637 ± 0.214 | 0.647 ± 0.222 | 0.561 |  |
| ***East Asian*** | 0.092 ± 0.167 | 0.089 ± 0.158 | 0.448 |  | 0.103 ± 0.184 | 0.079 ± 0.140 | 0.767 |  | 0.091 ± 0.162 | 0.091 ± 0.169 | 0.970 |  | 0.097 ± 0.180 | 0.084 ± 0.143 | 0.099 |  | 0.080 ± 0.124 | 0.101 ± 0.194 | 0.624 |  |
| ***Amerindian*** | 0.099 ± 0.083 | 0.090 ± 0.085 | 0.366 |  | 0.095 ± 0.080 | 0.096 ± 0.087 | 0.680 |  | 0.092 ± 0.082 | 0.105 ± 0.088 | 0.282 |  | 0.095 ± 0.081 | 0.096 ± 0.087 | 0.973 |  | 0.107 ± 0.095 | 0.084 ± 0.070 | 0.113 |  |
|  |  |  |  |  |  |  |  |  |  |  |  |  |  |  |  |  |  |  |  |  |
|  |  |  |  |  |  |  |  |  |  |  |  |  |  |  |  |  |  |  |  |  |
|  | ***HDL*** |  |  |  | ***LDL*** |  |  |  | ***Triglycerides*** |  |  |  | ***Fibrosis*** |  |  |  | ***Steatosis*** |  |  |  |
| ***Ancestry (mean ± sd)*** | ***Normal*** | ***Alterado*** | ***p-value*** |  | ***Normal*** | ***Alterado*** | ***p-value*** |  | ***Normal*** | ***Alterado*** | ***p-value*** |  | ***< F2*** | **≥*F2*** | ***p-value*** |  | ***1*** | ***2*** | ***3*** | ***p-value*** |
| ***African*** | 0.164 ± 0.161 | 0.188 ± 0.163 | 0.235 |  | 0.178 ± 0.167 | 0.155 ± 0.145 | 0.338 |  | 0.160 ± 0.155 | 0.182 ± 0.169 | 0.380 |  | 0.184 ± 0.171 | 0.145 ± 0.139 | 0.116 |  | 0.191 ± 0.168 | 0.150 ± 0.156 | 0.178 ± 0.156 | 0.223 |
| ***European*** | 0.637 ± 0.229 | 0.650 ± 0.196 | 0.999 |  | 0.630 ± 0.224 | 0.664 ± 0.205 | 0.327 |  | 0.646 ± 0.217 | 0.638 ± 0.221 | 0.793 |  | 0.640 ± 0.211 | 0.652 ± 0.223 | 0.526 |  | 0.619 ± 0.220 | 0.658 ± 0.225 | 0.655 ± 0.189 | 0.401 |
| ***East Asian*** | 0.103 ± 0.187 | 0.067 ± 0.100 | 0.319 |  | 0.092 ± 0.162 | 0.091 ± 0.173 | 0.846 |  | 0.093 ± 0.164 | 0.090 ± 0.164 | 0.747 |  | 0.082 ± 0.140 | 0.102 ± 0.185 | 0.132 |  | 0.105 ± 0.174 | 0.089 ± 0.162 | 0.068 ± 0.109 | 0.302 |
| ***Amerindian*** | 0.095 ± 0.081 | 0.095 ± 0.090 | 0.850 |  | 0.100 ± 0.090 | 0.090 ± 0.074 | 0.658 |  | 0.101 ± 0.089 | 0.091 ± 0.078 | 0.399 |  | 0.094 ± 0.076 | 0.102 ± 0.098 | 0.917 |  | 0.085 ± 0.060 | 0.103 ± 0.096 | 0.099 ± 0.089 | 0.881 |
